# Supplementary material for: Konjac Glucomannan Induced Retarding Effects on the Early Hydration of Cement
Source: MDPI journal article supplement (doi:10.3390/polym14051064), 2022-03-07
Supplement: s1 [file s1]

## Supporting Information

### Konjac glucomannan induced retarding effects on the early hydration of cement

**Table S1.** OPC composition analysis

| Phase       | CaO                           | SiO <sub>2</sub>  | Al <sub>2</sub> O <sub>3</sub> | SO <sub>3</sub> | Fe <sub>2</sub> O <sub>3</sub> | MgO  | K <sub>2</sub> O | TiO <sub>2</sub> |
|-------------|-------------------------------|-------------------|--------------------------------|-----------------|--------------------------------|------|------------------|------------------|
| Content (%) | 64.65                         | 20.42             | 4.68                           | 4.55            | 2.92                           | 1.08 | 0.78             | 0.32             |
| Phase       | P <sub>2</sub> O <sub>5</sub> | Na <sub>2</sub> O | SrO                            | MnO             | BaO                            | Cl   | ZnO              | ZrO <sub>2</sub> |
| Content (%) | 0.24                          | 0.11              | 0.06                           | 0.05            | 0.05                           | 0.04 | 0.03             | 0.02             |

**Table S2.** CSA composition analysis

| Phase       | CaO               | Al <sub>2</sub> O <sub>3</sub> | SO <sub>3</sub>               | SiO <sub>2</sub> | Fe <sub>2</sub> O <sub>3</sub> | TiO <sub>2</sub> | MgO              | F    |
|-------------|-------------------|--------------------------------|-------------------------------|------------------|--------------------------------|------------------|------------------|------|
| Content (%) | 60.73             | 15.26                          | 14.21                         | 4.97             | 2.52                           | 0.87             | 0.67             | 0.22 |
| Phase       | Na <sub>2</sub> O | Cl                             | P <sub>2</sub> O <sub>5</sub> | SrO              | MnO                            | BaO              | ZrO <sub>2</sub> | ZnO  |
| Content (%) | 0.15              | 0.15                           | 0.06                          | 0.05             | 0.05                           | 0.05             | 0.04             | 0.01 |

**Table S3.** CAC composition analysis

| Phase       | Al <sub>2</sub> O <sub>3</sub> | CaO              | SiO <sub>2</sub> | TiO <sub>2</sub> | Fe <sub>2</sub> O <sub>3</sub> | SO <sub>3</sub>  | K <sub>2</sub> O               | MgO                            |
|-------------|--------------------------------|------------------|------------------|------------------|--------------------------------|------------------|--------------------------------|--------------------------------|
| Content (%) | 50.59                          | 36.48            | 6.11             | 2.88             | 2.05                           | 0.64             | 0.58                           | 0.22                           |
| Phase       | P <sub>2</sub> O <sub>5</sub>  | ZrO <sub>2</sub> | SrO              | Cl               | Na <sub>2</sub> O              | ThO <sub>2</sub> | Ga <sub>2</sub> O <sub>3</sub> | Nb <sub>2</sub> O <sub>5</sub> |
| Content (%) | 0.17                           | 0.10             | 0.06             | 0.04             | 0.04                           | 0.02             | 0.01                           | 0.01                           |

**Table S4.** Molecular weight and apparent viscosity of KGM

|       | Treatment time (min) | Viscosity average molecular weight |                            |
|-------|----------------------|------------------------------------|----------------------------|
|       |                      | (10 <sup>5</sup> Da)               | apparent viscosity (mPa·s) |
| KGM-1 | 60                   | 0.8                                | 5800                       |
| KGM-2 | 20                   | 1.1                                | 10600                      |
| KGM-3 | 0                    | 2.8                                | 17650                      |

**Table S5.** The influence of various admixtures on cement pastes' setting time and heat release

| Admixtures           | Optimal dosage<br>(wt %) | Retarding time (min)                                 |                                                      | Temperature rise inhibiting       |                                                                    | Refs     |
|----------------------|--------------------------|------------------------------------------------------|------------------------------------------------------|-----------------------------------|--------------------------------------------------------------------|----------|
|                      |                          | $\Delta t_I$<br>(= $t_{I(admixture)} - t_{I(OPC)}$ ) | $\Delta t_F$<br>(= $t_{F(admixture)} - t_{F(OPC)}$ ) | Heat release<br>delay time<br>(h) | $\Delta_{Heat\ release} = \frac{Q_{OPC} - Q_{admixture}}{Q_{OPC}}$ |          |
| Sodium Fluosilicate  | 0.5                      | 580                                                  | 576                                                  |                                   | -                                                                  | [31]     |
| Threitol             | 1.5                      | 15                                                   | 30                                                   |                                   | -                                                                  |          |
| Xylitol              | 0.7                      | 325                                                  | 355                                                  |                                   | -                                                                  | [32]     |
| Sorbitol             | 0.8                      | 335                                                  | 375                                                  |                                   | -                                                                  |          |
| Sucrose              | 0.15                     | 310                                                  | 340                                                  |                                   | -                                                                  |          |
| Triisopropanolamine  | 1                        |                                                      | -                                                    | 0.3                               | +6%                                                                | [33]     |
| Glucose              | 1                        |                                                      | -                                                    | 5                                 | +13%                                                               |          |
| Starch               | 0.1                      |                                                      | -                                                    | 11                                | +7%                                                                | [34]     |
| Zinc oxide / sucrose | 0.5/0.15                 |                                                      | -                                                    | 43                                | +7%                                                                | [35]     |
| Triethanolamine      | 0.1                      | 40                                                   | -                                                    | 0.3                               | -                                                                  | [36]     |
| Sodium gluconate     | 0.24                     | 145                                                  | 150                                                  | 40                                | -                                                                  | [37,38]  |
| Maltodextrin         | 0.2                      | 180                                                  | 480                                                  | 18                                | -12%                                                               | [12]     |
| KGM                  | 0.2                      | 385                                                  | 1150                                                 | 90                                | -15%                                                               | Our work |

**Table S6.** The influence of different KGM content and molecular weight on cement hydration process and heat release.

| Fig. | Cement and dosage (wt %)<br>/molecular weight (10 <sup>5</sup> Da) | The induction<br>period deadline (h) | The peak exotherm of<br>acceleration (mW/g) | The acceleration period<br>deadline (h) | The cumulative heat (J)    |
|------|--------------------------------------------------------------------|--------------------------------------|---------------------------------------------|-----------------------------------------|----------------------------|
| a, e | OPC (0, 0.02, 0.1, 0.2)                                            | 3.5, 4.4, 20.0, 70.0                 | 4.4, 4.1, 3.3, 2.8                          | 17.5, 20.8, 48.2, 129.8                 | 644.5, 658.0, 653.2, 566.9 |
| b, f | CAC (0, 0.05, 0.2)                                                 | 5.5, 10.0, 20.0                      | 11.3, 9.8, 1.7                              | 9.2, 17.0, 26.5                         | 319.5, 309.5, 233.0        |
| c, g | CSA (0, 0.05, 0.2)                                                 | 2.0, 3.0, 4.0                        | 5.58, 5.54, 3.43                            | 3.2, 4.2, 6.7                           | 243.4, 235.9, 221.0        |
| d, h | OPC (0, 0.8, 1.1, 2.8)                                             | 3.5, 5.2, 5.8, 11.0                  | 2.2, 1.6, 1.5, 0.8                          | 16.5, 33.5, 34.8, 48.2                  | 333.3, 325.9, 321.9, 319.4 |

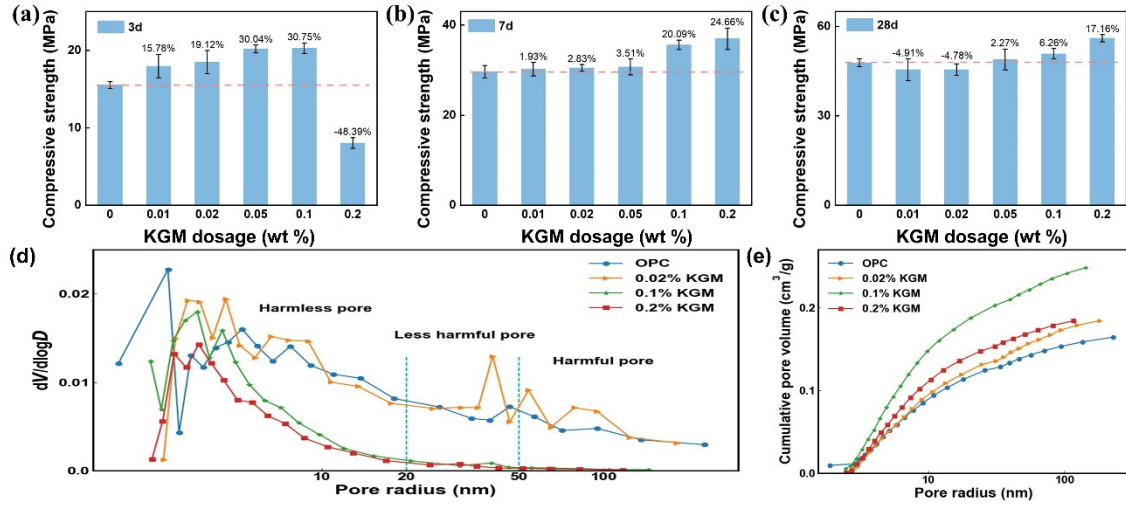

**Figure S1** The compressive strength of cement mortar admixed with different KGM dosages with w/c ratio of 0.5 at (a) 3 days, (b) 7 days and (c) 28 days and the porosity of cement mortar admixed with different KGM dosages with w/c ratio of 0.5 at 28 days: (d) the distribution of pore size and (e) cumulative pore volume.

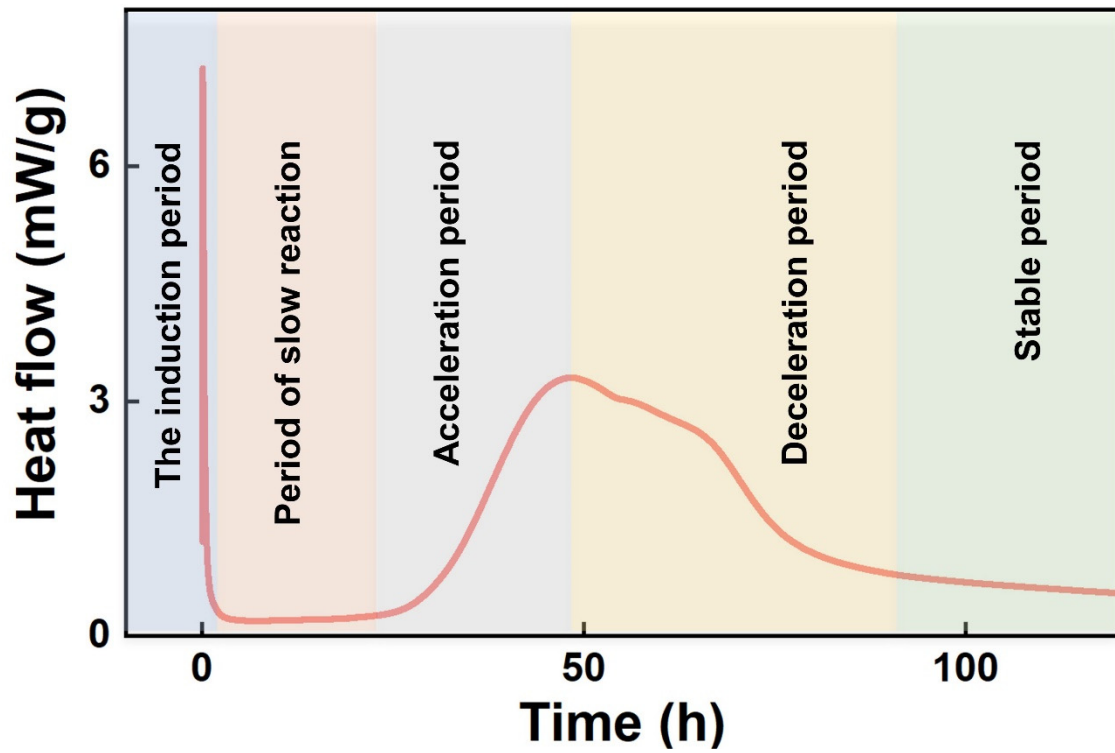

**Figure S2** Schematic diagram of cement hydration process.

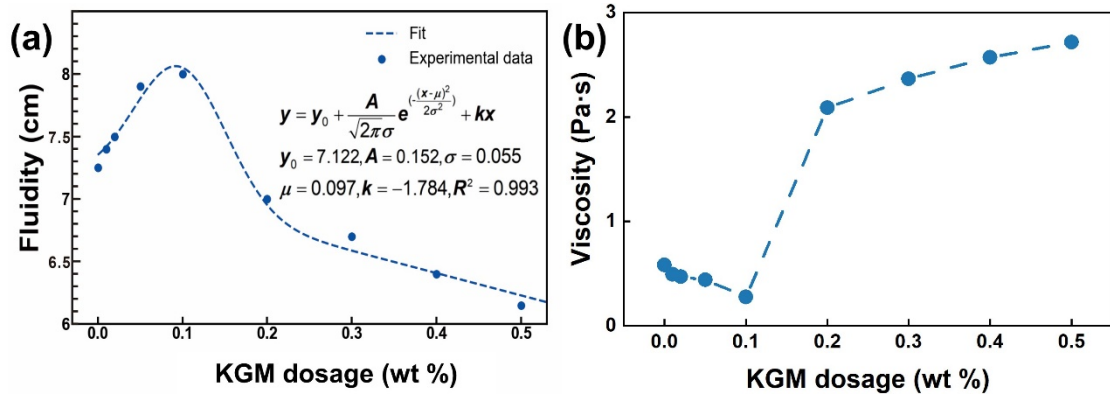

Figure S3 (a) The fluidity of cement pastes with different dosages of KGM with w/c ratio of 0.26 and (b) viscosity of cement paste with different KGM contents.

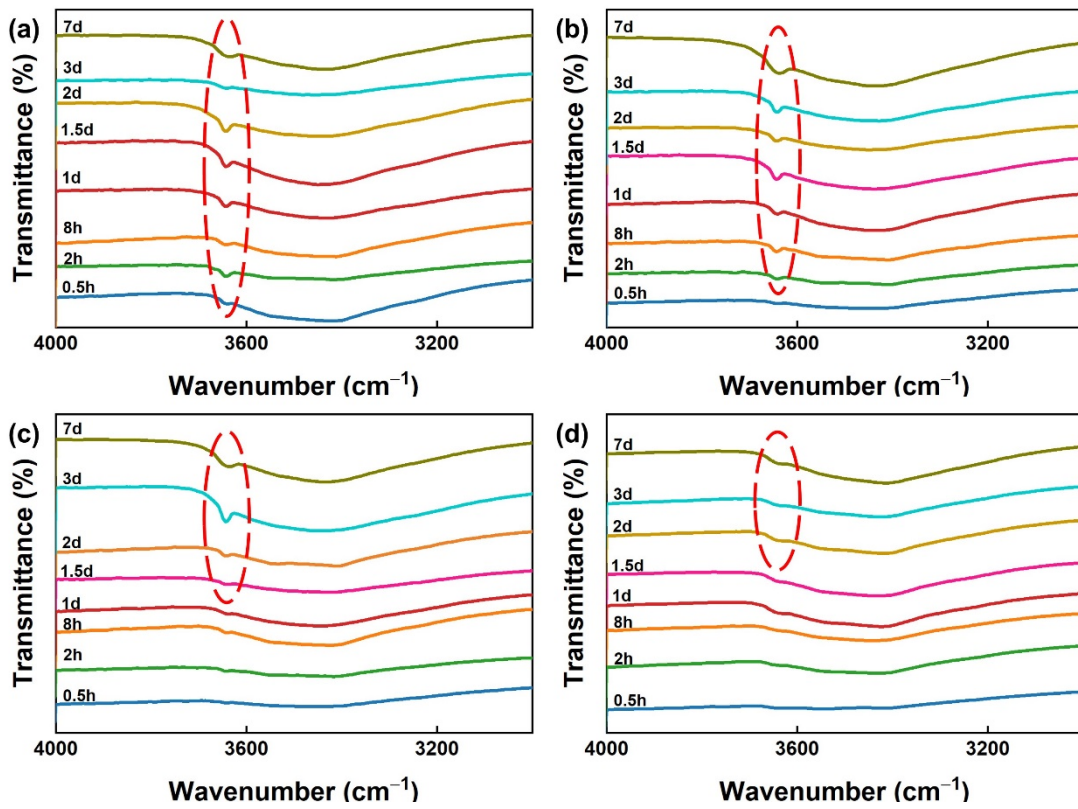

Figure S4 FTIR spectra of the cement pastes admixed with various KGM dosages: (a) pristine OPC and OPC with (b) 0.02 wt %, (c) 0.1 wt %; (d) 0.2 wt % of KGM.

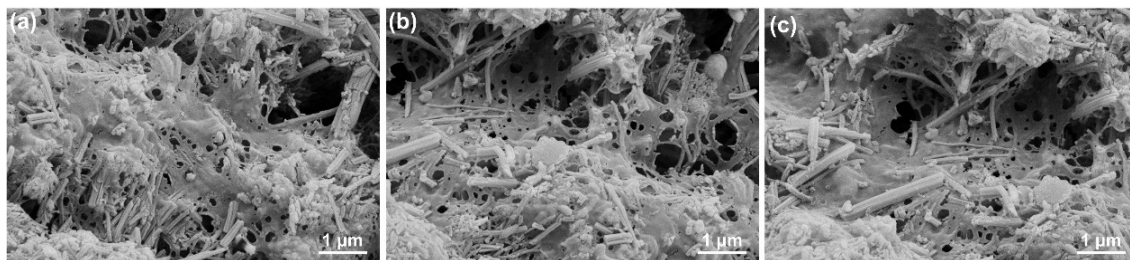

**Figure S5 (a-c)** The morphology of hydration products changes with 0.2 wt % KGM dosages.
